# Supplementary material for: A map of human circular RNAs in clinically relevant tissues
Source: PubMed Central journal article supplement (PMC5660143; doi:10.1007/s00109-017-1582-9), 2017-08-25
Supplement: 109_2017_1582_MOESM2_ESM.pdf [file 109_2017_1582_MOESM2_ESM.pdf]

**Electronic Supplementary Material (ESM)****J Mol Med 2017****Title: A map of human circular RNAs in clinically-relevant tissues**

Philipp G. Maass<sup>1,2,3,9\*</sup>, Petar Glažar<sup>2,9</sup>, Sebastian Memczak<sup>2</sup>, Gunnar Dittmar<sup>2</sup>, Irene Hollfinger<sup>1,2</sup>, Luisa Schreyer<sup>2</sup>, Aisha V. Sauer<sup>4</sup>, Okan Toka<sup>5,6</sup>, Alessandro Aiuti<sup>4,7</sup>, Friedrich C. Luft<sup>1,2,8</sup> and Nikolaus Rajewsky<sup>2\*</sup>

<sup>1</sup> Experimental and Clinical Research Center (ECRC), a joint cooperation between the Charité Medical Faculty and the Max Delbrück Center for Molecular Medicine (MDC), Lindenberger Weg 80, 13125 Berlin, Germany

<sup>2</sup> Max Delbrück Center for Molecular Medicine (MDC), Robert-Rössle-Strasse 10, 13125 Berlin, Germany

<sup>3</sup> Department of Stem Cell and Regenerative Biology, Harvard University, 7 Divinity Ave, Cambridge, MA 02138, USA

<sup>4</sup> Scientific Institute HS Raffaele, San Raffaele Telethon Institute for Gene Therapy (SR-Tiget), 20132 Milan, Italy

<sup>5</sup> Children's Hospital, Department of Pediatric Cardiology, Friedrich-Alexander University Erlangen, Loschge Strasse 15, 91054 Erlangen, Germany

<sup>6</sup> The German Registry for Congenital Heart Defects, Augustenburger Platz 1, 13353 Berlin, Germany

<sup>7</sup> Vita Salute San Raffaele University, Milan, Italy

<sup>8</sup> Department of Medicine, Division of Clinical Pharmacology, Vanderbilt University School of Medicine, Nashville, TN, 37235, USA

<sup>9</sup> The authors contributed equally to the project

\* Corresponding authors:

Philipp Maass: [philipp\\_maass@harvard.edu](mailto:philipp_maass@harvard.edu) and Nikolaus Rajewsky: [rajewsky@mdc-berlin.de](mailto:rajewsky@mdc-berlin.de)

**The authors provide this supplement to give readers additional information about their work.**

**Table S1.** Normalized sequencing statistics for the studied samples. (LCL = Lymphoblastoid Cell Line)

| sample         | total reads | %rRNA | non-rRNA | %genome | unmapped | circs total | circs QC | norm total | norm QC |
|----------------|-------------|-------|----------|---------|----------|-------------|----------|------------|---------|
| ADA-SCID LCL   | 20.4        | 31.1  | 14.1     | 82.2    | 2.5      | 4473        | 159      | 99465      | 53293   |
| adipose        | 17.9        | 38.4  | 11.1     | 84.3    | 1.7      | 2293        | 507      | 96986      | 71272   |
| cartilage      | 3.4         | 33.7  | 2.3      | 81.9    | 0.4      | 1049        | 0        | 3747       | 479     |
| chondrocytes   | 28.4        | 80.7  | 5.5      | 80.4    | 1.1      | 1104        | 148      | 67717      | 43437   |
| cortex         | 16.4        | 45.1  | 9.0      | 87.2    | 1.2      | 2393        | 343      | 91765      | 61470   |
| decidua        | 19.2        | 53.1  | 9.0      | 86.2    | 1.2      | 1989        | 115      | 100164     | 50402   |
| EPC            | 19.9        | 54.0  | 9.2      | 80.3    | 1.8      | 1856        | 93       | 99809      | 58926   |
| fibroblasts    | 11.3        | 37.8  | 7.0      | 83.0    | 1.2      | 2550        | 69       | 81844      | 38675   |
| HUAEC          | 18.3        | 34.8  | 12.0     | 75.3    | 3.0      | 1753        | 211      | 103747     | 83096   |
| HUVEC          | 13.6        | 91.2  | 1.2      | 75.7    | 0.3      | 428         | 19       | 29743      | 7690    |
| LCL            | 23.0        | 51.8  | 11.1     | 82.7    | 1.9      | 3019        | 204      | 101740     | 57733   |
| MSC            | 14.7        | 67.6  | 4.8      | 79.6    | 1.0      | 585         | 57       | 65267      | 42128   |
| muscle         | 16.7        | 59.8  | 6.7      | 85.6    | 1.0      | 1796        | 109      | 89450      | 40168   |
| osteocytes     | 16.3        | 65.7  | 5.6      | 78.8    | 1.2      | 1425        | 104      | 78022      | 55847   |
| placenta       | 20.5        | 70.7  | 6.0      | 87.4    | 0.8      | 667         | 63       | 65192      | 38906   |
| plasma         | 32.6        | 1.0   | 32.3     | 71.7    | 9.1      | 564         | 57       | 1109       | 155     |
| neutrophils    | 15.9        | 37.0  | 10.0     | 88.2    | 1.2      | 1655        | 274      | 59767      | 39193   |
| right atrium   | 20.7        | 39.6  | 12.5     | 85.2    | 1.8      | 2955        | 227      | 107733     | 57484   |
| serum          | 29.1        | 2.0   | 28.5     | 75.2    | 7.1      | 415         | 39       | 5548       | 1725    |
| platelets      | 24.3        | 30.1  | 17.0     | 86.6    | 2.3      | 8843        | 3324     | 61364      | 37316   |
| umbilical cord | 18.3        | 72.7  | 5.0      | 79.9    | 1.0      | 888         | 85       | 58718      | 31475   |
| vena cava      | 16.8        | 26.0  | 12.5     | 86.6    | 1.7      | 4337        | 471      | 103063     | 52578   |
| VSMC           | 14.2        | 44.6  | 7.9      | 80.3    | 1.6      | 1704        | 137      | 79970      | 56499   |
| WAS LCL        | 25.1        | 20.2  | 20.0     | 83.3    | 3.3      | 5826        | 1071     | 123734     | 90684   |

**Fig. S1.**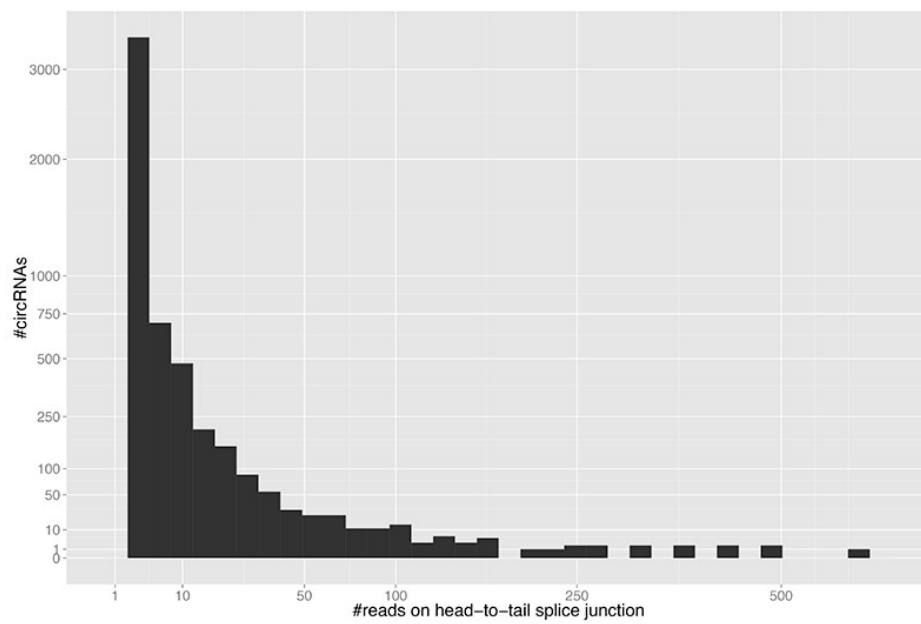

Number of reads on head-to-tail splice junctions of 8760 detected circRNAs.

Fig. S2.

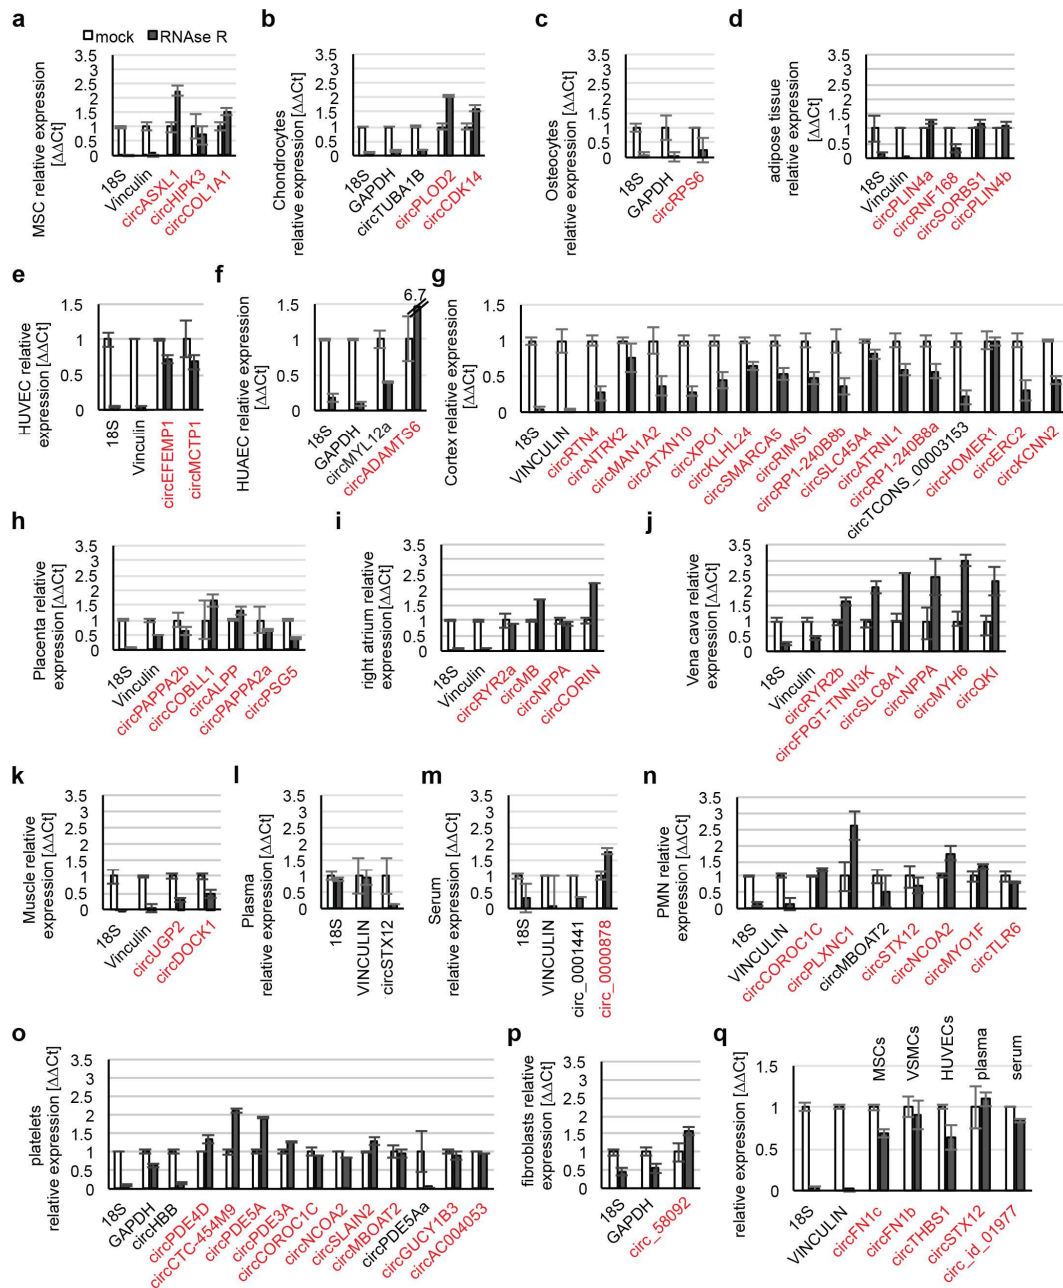

qRT-PCRs validated selected circRNAs (red labels) in various tissues that were at least 5x more resistant to RNase R treatment.

**Fig. S3.**

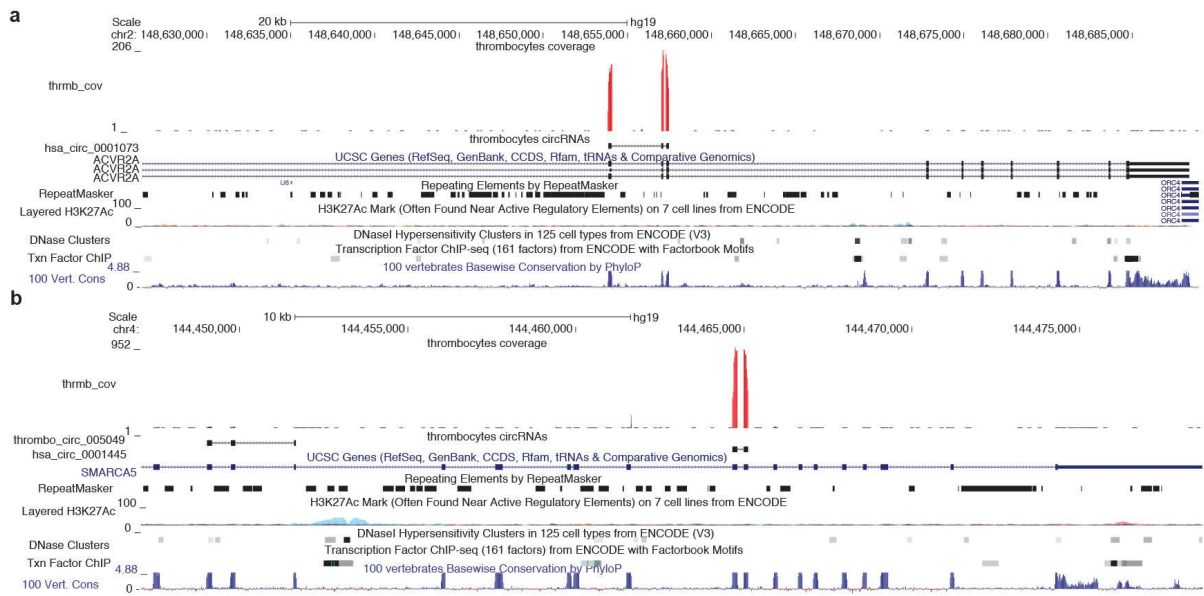

**a** *ACVR2A* and **b** *SMARCA5* circRNA/mRNA coverage (red peaks) in platelets. The expression of non-circularized exons (black peaks) is barely visible.

**Fig. S4.**

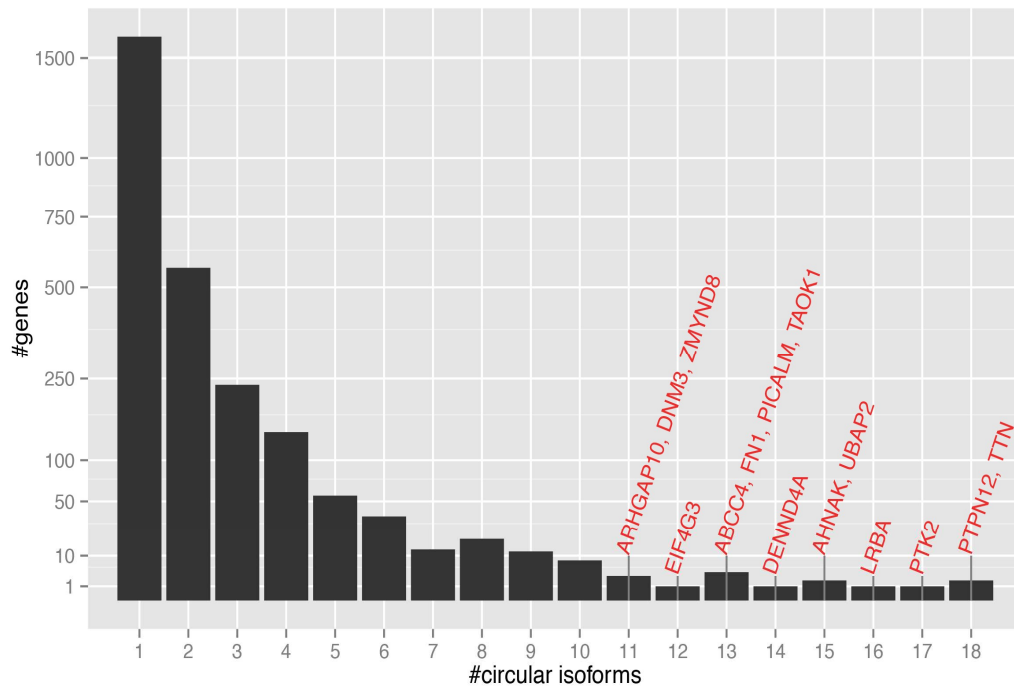

Number of circular isoforms detected in genes hosting circRNAs.



**b**

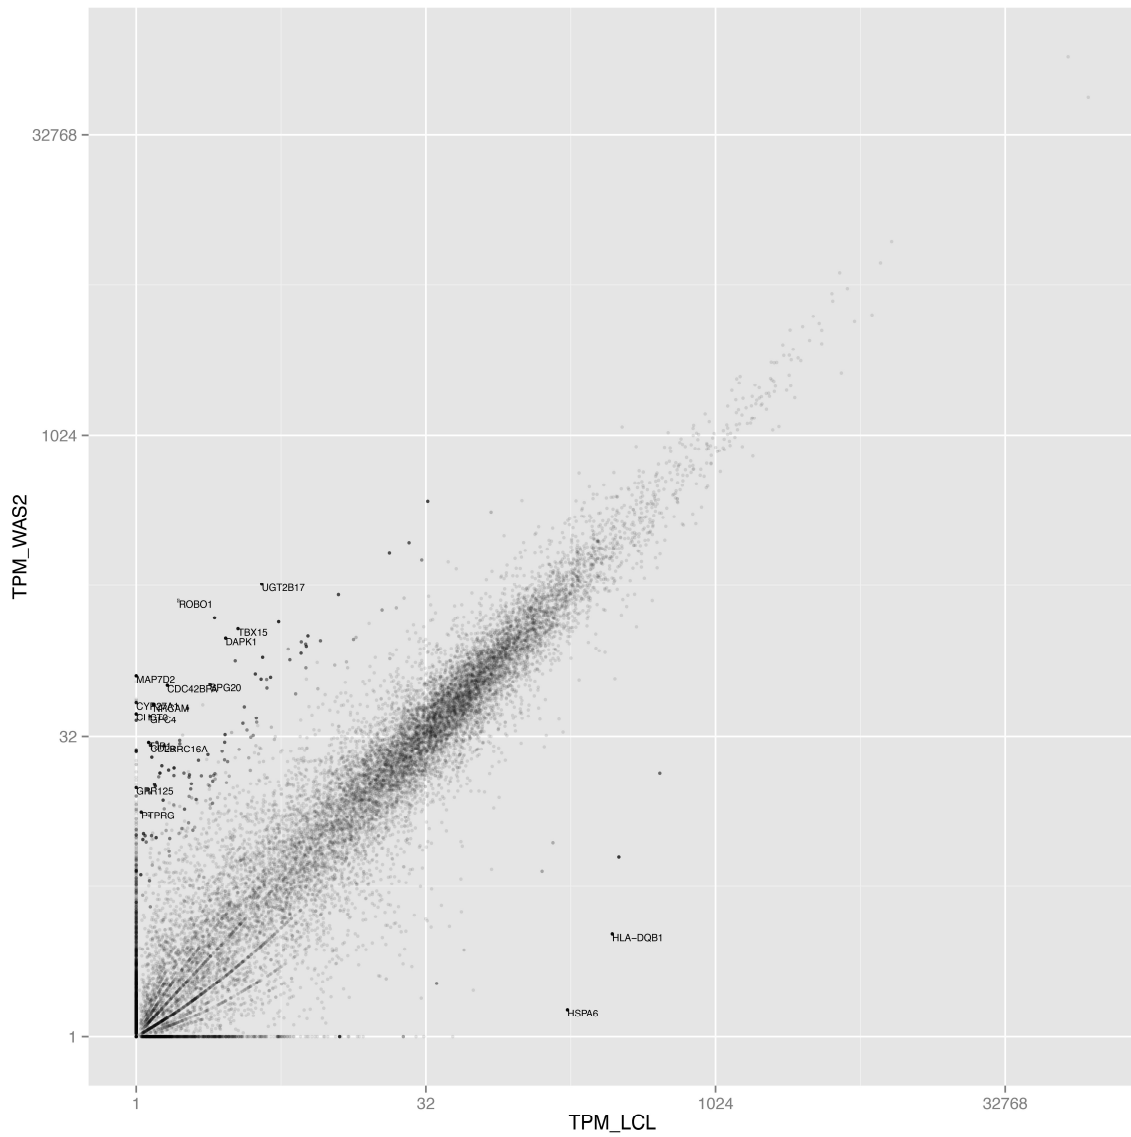

**a** Differentially expressed linear RNAs in LCLs of one ADA-SCID patient and **b** one patient with Wiskott-Aldrich syndrome (WAS) in comparison to LCLs of a non-affected control.



**Fig. S6.**

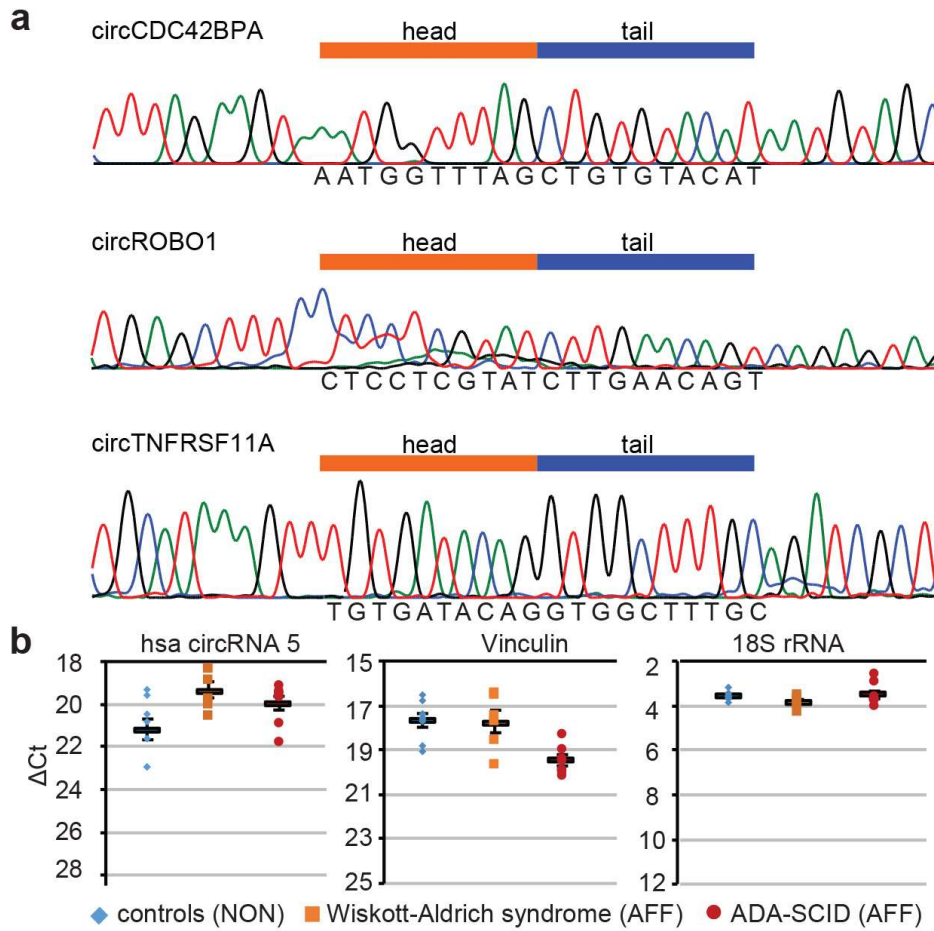

**a** Electropherograms of Sanger sequencing confirmed head-to-tail splicing of the circRNAs *circCDC42BPA*, *circROBO1* and *circTNFRSF11A*. **b** Controls in qRT-PCR quantifications of 3 Wiskott-Aldrich syndrome samples, 4 ADA-SCID samples, and 4 non-affected LCL controls (technical duplicates per group, bars: mean expression  $\pm$ SEM, Student's T test, \*\*\*  $p < 0.001$ , \*\*  $p < 0.01$ , \*  $p < 0.05$ ).
